# Supplementary material
Source: publisher figshare collection journal article supplement (https://frontiersin.figshare.com/ndownloader/files/22738115)
Supplement: Supplementary file 1 [file 22738115]

1            **Supplementary Material**  
2

## **A multidisciplinary approach for restoration ecology of shallow coastal lagoons, a case study in South France**

3  
4

5    **Rutger De Wit<sup>1</sup>, Amandine Leruste<sup>1</sup>, Ines Le Fur<sup>1,2</sup>, Mariam Maki Sy<sup>1</sup>, Béatrice Bec<sup>1</sup>,**  
6    **Vincent Ouisse<sup>2</sup>, Valerie Derolez<sup>2</sup>, Hélène Rey-Valette<sup>3</sup>**

7  
8  
9

10    <sup>1</sup> MARBEC, Université de Montpellier, CNRS, IRD, Ifremer, Montpellier, France

11    <sup>2</sup> MARBEC, Université de Montpellier, CNRS, IRD, Ifremer, Sète, France

12    <sup>3</sup> CEE-M, Université de Montpellier, CNRS, INRA, Montpellier SupAgro, Montpellier, France

13

14    **\* Correspondence:**

15    Rutger De Wit

16    rutger.de-wit@umontpellier.fr

17    **Keywords:** Restoration ecology, ecological restoration, water quality, WFD, ecosystem  
18    trajectories, DPSIR, conservation, ecological indices

19  
20

### **A contribution for:**

21    SI Ecosystem Services, Biodiversity and Water Quality in Transitional Ecosystems

22

23    hosted by Dr(s) Michele Mistri , Alice Newton , Angel Pérez-Ruzafa , Sofia Reizopoulou in

24    **Frontiers in Ecology and Evolution** - section Conservation.

25  
26

27 **Table S1: Modified from Sy et al. (2018). The Q-set composed of the final list of potential**  
 28 **ecosystem services supplied by Palavas lagoons. The Ecosystem services (ES) in bold, i.e.**  
 29 **Fish farming, is currently not exploited in the Palavas lagoons.**  
 30  
 31

| ES categories                              | ES subcategories              | ES#       | Ecosystem service                                           | General definition                                                                                                                           |
|--------------------------------------------|-------------------------------|-----------|-------------------------------------------------------------|----------------------------------------------------------------------------------------------------------------------------------------------|
| <b>Provisioning services</b>               | Food provision                | 15        | Shellfish resources                                         | The provision of biomass for human consumption and the conditions to grow it. It mostly relates to cropping, animal husbandry and fisheries. |
|                                            |                               | 19        | Biomass for grazing                                         |                                                                                                                                              |
|                                            |                               | 21        | Crops                                                       |                                                                                                                                              |
|                                            |                               | 22        | Shellfish farming                                           |                                                                                                                                              |
|                                            |                               | 23        | Fish resources                                              |                                                                                                                                              |
|                                            |                               | <b>30</b> | <b>Fish farming</b>                                         |                                                                                                                                              |
|                                            | Water provision               | 29        | Commercial inland navigation                                | The provision of water for human consumption and for other uses.                                                                             |
|                                            | Biotic materials and biofuels | 31        | Non-food products                                           | The provision of biomass or biotic elements for non-food purposes.                                                                           |
| <b>Regulation and maintenance services</b> | Water purification            | 14        | Purification capacity                                       | Biochemical and physicochemical processes involved in the removal of wastes and pollutants from the aquatic environment.                     |
|                                            |                               | 20        | Wastes decomposition                                        |                                                                                                                                              |
|                                            | Coastal protection            | 5         | Flooding and other extreme events regulation and protection | Protection against floods, droughts, hurricanes and other extreme events. Also, erosion prevention in the coast.                             |
|                                            |                               | 13        | Banks reinforcement                                         |                                                                                                                                              |
|                                            | Climate regulation            | 25        | Microclimate regulation                                     | Regulation of greenhouse and climate active gases. The most common proxies are the uptake, storage and sequestration of carbon dioxide.      |
|                                            | Life cycle maintenance        | 3         | Nursery and biodiversity maintenance                        | Biological and physical support to facilitate the healthy and diverse reproduction of species.                                               |
| <b>Cultural services</b>                   | Symbolic and aesthetic values | 2         | Aesthetic value of landscapes                               | Exaltation of senses and emotions by landscapes, habitats or species.                                                                        |
|                                            |                               | 7         | Local identity                                              |                                                                                                                                              |
|                                            |                               | 9         | Aesthetic value of habitats or species                      |                                                                                                                                              |
|                                            |                               | 11        | Historical sites                                            |                                                                                                                                              |
|                                            | Recreation and tourism        | 4         | Recreational boat navigation                                | Opportunities that the natural environment provide for relaxation and amusement.                                                             |
|                                            |                               | 8         | Non-motorized water sports                                  |                                                                                                                                              |
|                                            |                               | 12        | Bird watching                                               |                                                                                                                                              |
|                                            |                               | 16        | Cycling                                                     |                                                                                                                                              |
|                                            |                               | 17        | Horse riding                                                |                                                                                                                                              |
|                                            |                               | 18        | Waterfowl hunting                                           |                                                                                                                                              |
|                                            |                               | 24        | Sentiment of relaxation                                     |                                                                                                                                              |
|                                            |                               | 26        | Camping                                                     |                                                                                                                                              |
|                                            | Cognitive effects             | 1         | Artistic inspiration                                        | Trigger of mental processes like knowing, developing, perceiving, or being aware resulting from natural landscapes or living organisms.      |
|                                            |                               | 6         | Research opportunity                                        |                                                                                                                                              |
|                                            |                               | 10        | Environmental education                                     |                                                                                                                                              |

32 **Table S2: Survey and demographic characteristics of local citizens involved in the citizen**  
 33 **workshop**

| <b>Survey characteristics</b>       |                      |
|-------------------------------------|----------------------|
| Number                              | 43                   |
| Periods                             | May 2017<br>May 2018 |
| Data collection method              | Workshop             |
| Duration                            | 45 minutes           |
| <b>Demographic characteristics</b>  |                      |
| Age (mean)                          | 54 years             |
| Gender                              |                      |
| <i>Male</i>                         | 46.5%                |
| <i>Female</i>                       | 53.5%                |
| Education                           |                      |
| <i>High school diploma or lower</i> | 25.6%                |
| <i>Bachelor or lower</i>            | 53.5%                |
| % > Bachelor degree                 | 20.9%                |

34

35

36 **Table S.3 Pairwise comparisons between groups to identify consensus and distinguishing ESs**  
 37 **among the three stakeholder groups created from the 43 participants (local residents) based on**  
 38 **the three factors extracted (i.e., an extracted factor allows to create a group of respondents with**  
 39 **rather similar response profiles, cf. Sy et al., 2018). Differences in bootstrapped z-scores with P-**  
 40 **values.**  
 41

| ES categories                              | #                       | Statement                                                   | G1 vs. G2      | G1 vs. G3      | G2 vs. G3      |
|--------------------------------------------|-------------------------|-------------------------------------------------------------|----------------|----------------|----------------|
| <b>Provisioning services</b>               | 15                      | Shellfish resources                                         | <b>-0.92*</b>  | -0.24          | 0.68           |
|                                            | 19                      | Biomass for grazing                                         | <b>-1.19**</b> | <b>-1.27*</b>  | -0.08          |
|                                            | 21                      | Crops                                                       | -0.04          | <b>1.52*</b>   | <b>1.56*</b>   |
|                                            | 22                      | Shellfish farming                                           | -0.39          | <b>-1.80**</b> | <b>-1.41*</b>  |
|                                            | 23                      | Fish resources                                              | 0.40           | 0.66           | 0.26           |
|                                            | 30                      | Fish farming                                                | -0.10          | <b>1.62**</b>  | <b>1.72**</b>  |
|                                            | 29*                     | Commercial inland navigation or Hydrological regulation     | -0.71          | -0.54          | 0.16           |
|                                            | 31                      | Non-food products                                           | -0.44          | <b>-1.36*</b>  | -0.92          |
| <b>Regulation and maintenance services</b> | 14                      | Purification capacity                                       | <b>-1.14**</b> | <b>1.20*</b>   | <b>2.34**</b>  |
|                                            | 20                      | Wastes decomposition                                        | 0.41           | <b>1.19*</b>   | 0.78           |
|                                            | 5                       | Flooding and other extreme events regulation and protection | 0.20           | 0.74           | 0.55           |
|                                            | 13                      | Banks reinforcement                                         | <b>-1.62**</b> | 0.07           | <b>1.69**</b>  |
|                                            | 25                      | Microclimate regulation                                     | 0.16           | 1.01           | 0.85           |
|                                            | 3                       | Nursery and biodiversity maintenance                        | <b>0.74*</b>   | 0.53           | -0.21          |
| <b>Cultural services</b>                   | 2                       | Aesthetic value of landscapes                               | <b>0.75*</b>   | -0.70          | <b>-1.45*</b>  |
|                                            | 7                       | Local identity                                              | <b>-0.98**</b> | -0.82          | 0.16           |
|                                            | 9                       | Aesthetic value of habitats or species                      | -0.35          | -0.38          | -0.03          |
|                                            | 11                      | Historical sites                                            | -0.07          | -0.88          | -0.81          |
|                                            | 4                       | Recreational boat navigation                                | 0.27           | 0.17           | -0.09          |
|                                            | 8                       | Non-motorized water sports                                  | <b>1.76**</b>  | <b>1.85**</b>  | 0.09           |
|                                            | 12                      | Bird watching                                               | <b>1.24**</b>  | 0.29           | -0.95          |
|                                            | 16                      | Cycling                                                     | <b>1.17**</b>  | -0.44          | <b>-1.62**</b> |
|                                            | 17                      | Horse riding                                                | <b>0.84*</b>   | 0.92           | 0.08           |
|                                            | 18                      | Waterfowl hunting                                           | <b>-1.43**</b> | -0.76          | 0.66           |
|                                            | 24                      | Sentiment of relaxation                                     | <b>0.86**</b>  | 0.57           | -0.29          |
|                                            | 26                      | Camping                                                     | -0.25          | -0.84          | -0.59          |
|                                            | 27                      | Recreational hiking and walking                             | <b>-1.32**</b> | -0.79          | 0.53           |
|                                            | 28                      | Recreational fishing                                        | <b>-0.76*</b>  | -0.65          | 0.11           |
| 1                                          | Artistic inspiration    | <b>0.98**</b>                                               | -1.10          | <b>-2.07**</b> |                |
| 6                                          | Research opportunity    | <b>1.00**</b>                                               | 0.29           | -0.71          |                |
| 10                                         | Environmental education | <b>0.95*</b>                                                | -0.04          | -0.98          |                |

42  
 43 Note: Ecosystem services (ESs) #30 is currently unused in Palavas lagoons.  
 44 Significance of distinctiveness of an ES (see Brown, 1980; Zabala and Pascual, 2016) is indicated for p-  
 45 values: \*\*p≤0.01; \*p≤0.05. ESs which are not distinguishing for any of the groups are consensus ESs  
 46 (see also Sy et al., 2018).  
 47  
 48

49  
50 **Figures**

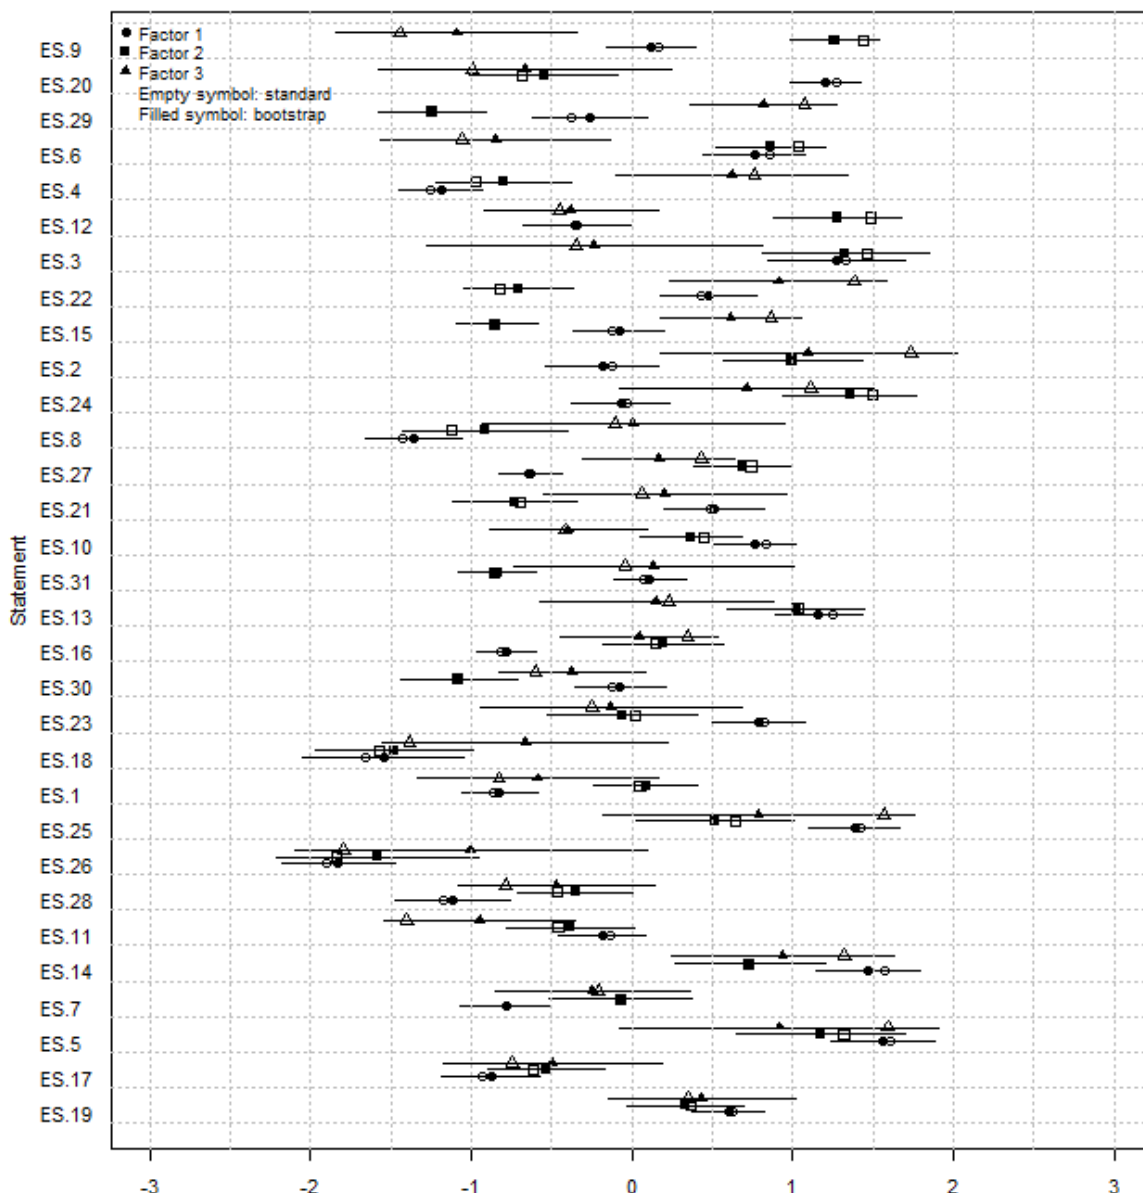

51  
52 **Figure 15:** Graph illustrating consensus and distinguishing ESs among the three stakeholder groups created from  
53 the 43 participants (local residents) based on the three factors extracted (i.e., an extracted factor allows  
54 to create a group of respondents with rather similar response profiles, cf. Sy et al., 2018). Please refer  
55 to Table S1 to find the correspondence between the ES number and its description. The bootstrapped  
56 scores of an ES are indicated by filled circles, squares and triangles for stakeholders' group 1, 2 and 3,  
57 respectively (see Table S1 for the list of Ecosystem services, ES, see Table S2 for representative Q-sorts  
58 for each group and Table 3 in the main text for an interpretation of the main features of each group).  
59 The bars characterize the variability of the estimates in the bootstrap. An ES is consensual among the  
60 groups of stakeholders when the corresponding error bars overlap. ESs at the bottom are the most  
61 consensual ones while ESs with diverging appreciations are depicted at the top of the graph. (For  
62 general information on methodology see Zabala (2014) and Sy et al. (2018), for detailed information on  
63 the bootstrapping analysis see Zabala et al. (2016).  
64  
65  
66  
67

68

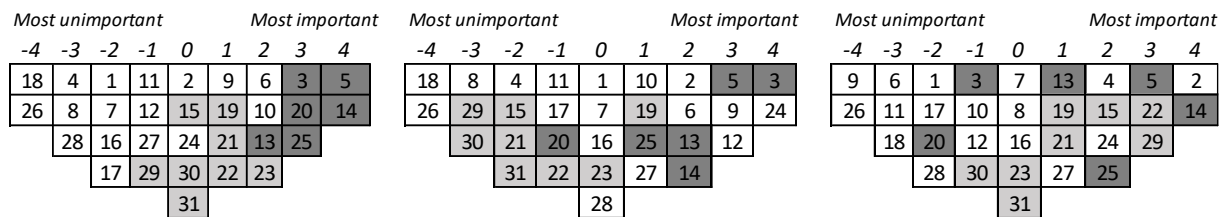

69 **Group 1** **Group 2** **Group 3**  
 70 **Figure 2S:** Q sorts of Ecosystem services that are representative for the different groups of respondents (43 local  
 71 residents that participated in citizens’ workshops). See Table S1 for the correspondence between the  
 72 ESs-numbers used and ESs descriptions, with background colors indicating ESs category: i) light grey =  
 73 provisioning services, ii) dark grey = regulation and maintenance services, and iii) white = cultural  
 74 services.  
 75

76  
 77 **Cited references:**

78  
 79  
 80 Sy M.M., Rey-Valette H., Simier M., Pasqualini V., Figuières Ch., De Wit R. (2018). Identifying  
 81 Consensus on Coastal Lagoons Ecosystem Services and Conservation Priorities for  
 82 an Effective Decision Making: A Q Approach. *Ecological Economics* 154, 1–13  
 83 Zabala, A. (2014). qmethod: a package to explore human perspectives using Q methodology. *R*  
 84 *J.* 6, 163–173.  
 85 Zabala, A., Pascual, U. (2016). Bootstrapping Q methodology to improve the understanding of  
 86 human perspectives. *PLoS One* 11, e0148087.  
 87 <https://doi.org/10.1371/journal.pone.0148087>.  
 88  
 89  
 90
